# Supplementary material for: HIV-1-infected human macrophages, by secreting RANKL, contribute to enhanced osteoclastogenesis
Source: bioRxiv or medRxiv preprint supplement (doi:10.1101/2020.02.14.947614), 2020-02-14
Supplement: Supplementary file [file media-1.pdf]

## Supplemental Tables

**Supplemental table 1** : list of primers used for cDNA amplification

| Gene               | Forward primer (5'-3')        | Reverse primer (5'-3')      |
|--------------------|-------------------------------|-----------------------------|
| Actin              | TCCCTGGAGAAGAGCTACGA          | AGGAAGGAAGGCTGCAAGAG        |
| ATP6V1C1           | CGGCAACTTCAAAGAACAAT          | AAGCCCAACAGGAACCACACTG      |
| Cathepsin K        | GATGACTGGACTCAAAGTACC         | AAGCCCAACAGGAACCACACTG      |
| Gag                | AGTGGGGGGACATCAAGCAGCCATGCAAT | TGCTATGTCACTTTCCCTTGGTTCTCT |
| NFATc1             | CACCGCATCACAGGGAAGAC          | GCACAGTCAATGACGGCTC         |
| RhoE               | GACTTTCGGGTTCTCTCT            | CAAAGCAAATCAGCACAGC         |
| TNF $\alpha$       | GAGGCCAAGCCCTGGTATG           | CGGGCCGATTGATCTCAGC         |
| TRAP               | TGACTTCCTCAGCCAGCA            | AGCCACGCCATTCTCATCTTG       |
| $\beta$ 3 integrin | CCTGCTCATCTGGAAACTC           | TGGGTTGTTGGCTGTGTC          |

**Supplemental table 2** : list of primary antibodies used and applications

| Target protein     | Host specie | Clonality                                     | Supplier                 | Application | Catalog number |
|--------------------|-------------|-----------------------------------------------|--------------------------|-------------|----------------|
| Anti-human HRP     | Goat        | Polyclonal                                    | Sigma                    | ELISA       | A0170          |
| HIV (detection)    | Human       | Polyclonal                                    | NIH AIDS Reagent Program | ELISA       | 3957           |
| HIV-p24 (Capture)  | Mouse       | Monoclonal (IgG1 $\kappa$ ), clone 183-H12-5C | NIH AIDS Reagent Program | ELISA       | 3537           |
| Anti-mouse AF555   | Goat        | Polyclonal                                    | Cell Signaling           | IF          | 4084           |
| HIV-p24            | Mouse       | Monoclonal (IgG1), clone FH190-1-1            | Beckman Coulter          | IF          | KC57-RD1       |
| Vinculin           | Mouse       | Monoclonal (IgG1), clone hVIN-1               | Sigma                    | IF          | V9131          |
| Anti-mouse HRP     | Goat        | Polyclonal                                    | Dako                     | WB          | P0447          |
| Anti-rabbit HRP    | Goat        | Polyclonal                                    | Dako                     | WB          | P0448          |
| Cathepsin K        | Rabbit      | Polyclonal                                    | Abcam                    | WB          | ab19027        |
| RhoE               | Mouse       | Monoclonal (IgG1)                             | Cell Signaling           | WB          | 3664           |
| Tubulin            | Mouse       | Monoclonal (IgG1), clone B5-1-2               | Sigma                    | WB          | T5168          |
| $\beta$ 3 integrin | Rabbit      | Polyclonal                                    | Cell Signaling           | WB          | 4702           |

## Supplemental Figure legends

**Supplemental Figure 1 :** (A) Infection of MF with HIV-1 (ADA or NLAD8 strain) was evaluated by measuring the expression of the viral gene Gag by RT-qPCR (left panel, results are normalized to GAPDH expression), calculating the fusion index by immunofluorescence (middle) and measuring p24 release in the supernatant by ELISA (right). Bars represent median, n = 4 to 9 donors. (B ) Representative IF images of MF infected with Transmitted/founder strains SUMA (left) and THRO (right) after staining of HIV-p24 (red), F-actin (green), and nuclei (DAPI, blue). Scale bar, 20  $\mu\text{m}$ . (E) Cathepsin K (Ctsk) protein expression level was measured by Western blot in lysates from OC and infected (HIV-MF , ADA or NLAD8 strain) or uninfected MF (NI-MF). Tubulin was used as loading control. A representative blot and quantification of CtsK level relative to autologous NI-MF are shown. Bars represent median, n = 6 donors. \*  $p \leq 0.05$  ; \*\*  $p \leq 0.001$  ; \*\*\*  $p \leq 0.001$ , ns: not significantly different.

**Supplemental Figure 2 :** Monocytes were seeded on bone slices, differentiated into macrophages for 7 days. Cells were then infected or not with HIV-1 and all cells were fixed at day 14. Representative IF images of cells after staining for HIV-p24 (red), F-actin (green), and nuclei (DAPI, blue). Scale bar, 10  $\mu\text{m}$ .

**Supplemental Figure 3 :** (A-B) MF were infected or not with HIV-1 (ADA or NLAD8 strain) for 10 days and their expression of pro-inflammatory cytokines was evaluated. (A) Released IL-1 $\beta$  (left) and IL6 (right) was measured in the supernatants by ELISA. Bars represent median, n = 5 to 7 donors. (B) TNF $\alpha$  expression was measured by RT-qPCR (results are normalized to actin). Bars represent median, n = 3 to 6 donors.
