# Supplementary material for: HIV-1-infected human macrophages, by secreting RANKL, contribute to enhanced osteoclastogenesis
Source: bioRxiv or medRxiv preprint supplement (doi:10.1101/2020.02.14.947614), 2020-02-14

# Supplemental Figure 1

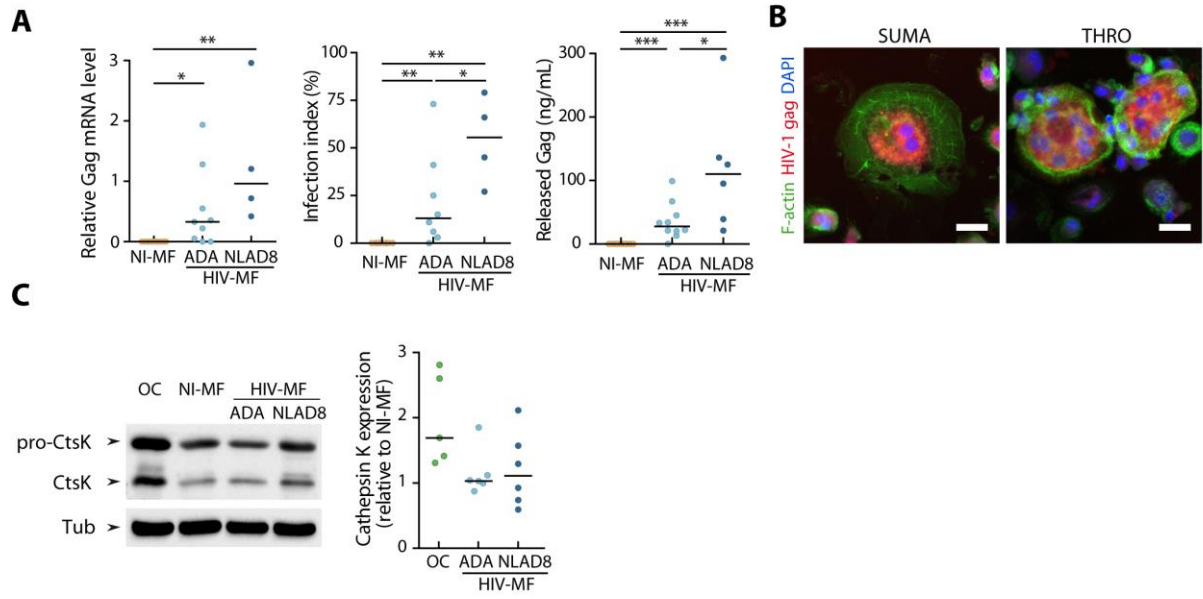

# Supplemental Figure 2

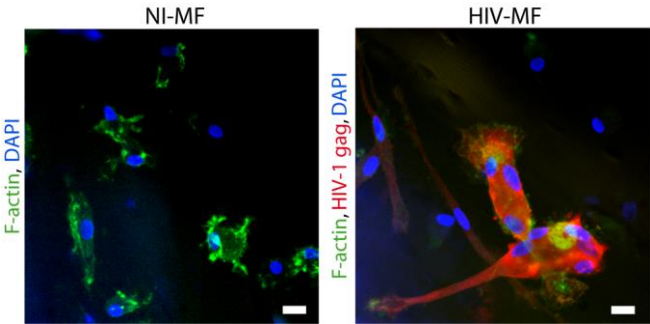

### Supplemental Figure 3

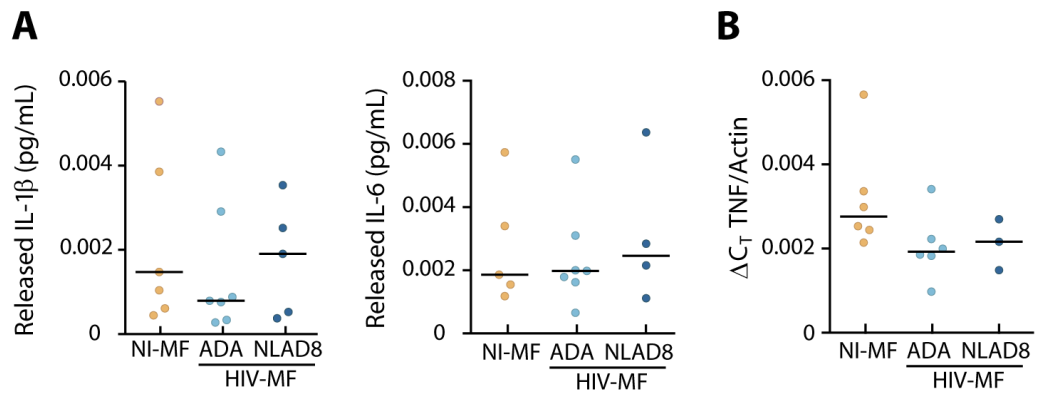

Supplement: Supplementary file [file media-2.pdf]
